# Supplementary material for: Utility of a Molecular Signature for Predicting Recurrence and Progression in Non-Muscle-Invasive Bladder Cancer Patients: Comparison with the EORTC, CUETO and 2021 EAU Risk Groups
Source: MDPI journal article supplement (doi:10.3390/ijms232214481), 2022-11-21
Supplement: s1 [file s1]

**Supplementary Table S1.** Classification of NMIBC samples analyzed by RNA-seq

| Samples | Cluster 1 (EP) | Cluster 2 (REC.BCG+) | Cluster 3 (DP.BCG+) | Predicted Cluster |
|---------|----------------|----------------------|---------------------|-------------------|
| NMIBC1  | 0.999826468    | 0.000173532          | 4.10E-17            | 1                 |
| NMIBC2  | 1              | 1.56E-12             | 7.50E-25            | 1                 |
| NMIBC3  | 0.999880492    | 9.65E-17             | 0.000119508         | 1                 |
| NMIBC4  | 3.14E-16       | 1.08E-18             | 1                   | 3                 |
| NMIBC5  | 0.021204118    | 0.978795882          | 1.86E-17            | 2                 |
| NMIBC6  | 8.93E-23       | 7.83E-16             | 1                   | 3                 |
| NMIBC7  | 7.61E-09       | 2.07E-17             | 0.999999992         | 3                 |
| NMIBC8  | 0.999999895    | 1.05E-07             | 8.68E-15            | 1                 |
| NMIBC9  | 0.456925051    | 0.543074949          | 5.67E-15            | 2                 |
| NMIBC10 | 0.99999993     | 1.51E-18             | 6.99E-08            | 1                 |
| NMIBC11 | 0.866265425    | 1.19E-07             | 0.133734457         | 1                 |
| NMIBC12 | 0.816984088    | 0.183015912          | 1.99E-12            | 1                 |
| NMIBC13 | 4.38E-05       | 5.01E-11             | 0.999956166         | 3                 |
| NMIBC14 | 0.841334604    | 0.158665392          | 3.66E-09            | 1                 |
| NMIBC15 | 0.152086245    | 0.847913755          | 2.17E-13            | 2                 |
| NMIBC16 | 3.27E-07       | 1.77E-17             | 0.999999673         | 3                 |
| NMIBC17 | 0.000151326    | 0.999848674          | 1.21E-18            | 2                 |
| NMIBC18 | 5.61E-08       | 6.07E-17             | 0.999999944         | 3                 |
| NMIBC19 | 0.000209725    | 1.53E-06             | 0.999788742         | 3                 |
| NMIBC20 | 0.037962519    | 6.84E-07             | 0.962036797         | 3                 |
| NMIBC21 | 6.50E-13       | 2.51E-16             | 1                   | 3                 |
| NMIBC22 | 5.87E-10       | 0.999999999          | 1.01E-15            | 2                 |
| NMIBC23 | 4.18E-06       | 0.999995823          | 2.77E-18            | 2                 |
| NMIBC24 | 0.014531173    | 0.985123067          | 0.00034576          | 2                 |
| NMIBC25 | 0.999767171    | 0.000232829          | 1.10E-14            | 1                 |
| NMIBC26 | 0.014387981    | 0.985612019          | 7.33E-16            | 2                 |
| NMIBC27 | 1.61E-13       | 4.43E-19             | 1                   | 3                 |
| NMIBC28 | 8.93E-08       | 2.81E-07             | 0.99999963          | 3                 |
| NMIBC29 | 3.19E-06       | 0.999996811          | 5.25E-18            | 2                 |
| NMIBC30 | 5.11E-08       | 6.64E-10             | 0.999999948         | 3                 |
| NMIBC31 | 1.01E-17       | 3.33E-18             | 1                   | 3                 |
| NMIBC32 | 2.11E-06       | 0.999997893          | 2.64E-16            | 2                 |
| NMIBC33 | 5.35E-05       | 0.999921427          | 2.50E-05            | 2                 |
| NMIBC34 | 1.15E-12       | 4.18E-17             | 1                   | 3                 |
| NMIBC35 | 6.07E-17       | 1.43E-17             | 1                   | 3                 |
| NMIBC36 | 1.41E-07       | 0.999999858          | 1.81E-10            | 2                 |
| NMIBC37 | 1.80E-05       | 0.999979184          | 2.84E-06            | 2                 |
| NMIBC38 | 5.24E-09       | 0.999999995          | 7.38E-15            | 2                 |
| NMIBC39 | 1.15E-12       | 1.48E-16             | 1                   | 3                 |
| NMIBC40 | 1.84E-07       | 0.999999816          | 6.86E-17            | 2                 |
| NMIBC41 | 0.951411208    | 0.048588792          | 2.07E-17            | 1                 |

|         |             |             |             |   |
|---------|-------------|-------------|-------------|---|
| NMIBC42 | 0.121416476 | 0.878583524 | 7.11E-12    | 2 |
| NMIBC43 | 2.30E-13    | 1.30E-16    | 1           | 3 |
| NMIBC44 | 0.998864278 | 8.29E-17    | 0.001135722 | 1 |
| NMIBC45 | 2.06E-12    | 8.98E-19    | 1           | 3 |
| NMIBC46 | 0.999999855 | 1.45E-07    | 6.28E-12    | 1 |
| NMIBC47 | 0.999995848 | 4.15E-06    | 2.17E-20    | 1 |
| NMIBC48 | 1.22E-10    | 0.999999999 | 5.32E-10    | 2 |
| NMIBC49 | 0.009803419 | 0.990196581 | 5.43E-13    | 2 |
